# Supplementary material for: Predictive Value of Remnant Cholesterol Inflammatory Index for Cardiovascular-Kidney-Metabolic Syndrome Progression: A Prospective Cohort Study
Source: Research Square preprint supplement (doi:10.21203/rs.3.rs-7052398/v1), 2025-07-22
Supplement: Supplementary file 1 [file 6663b6e3b8b31717a3f29180.docx]

**Supplemental figures:**

**
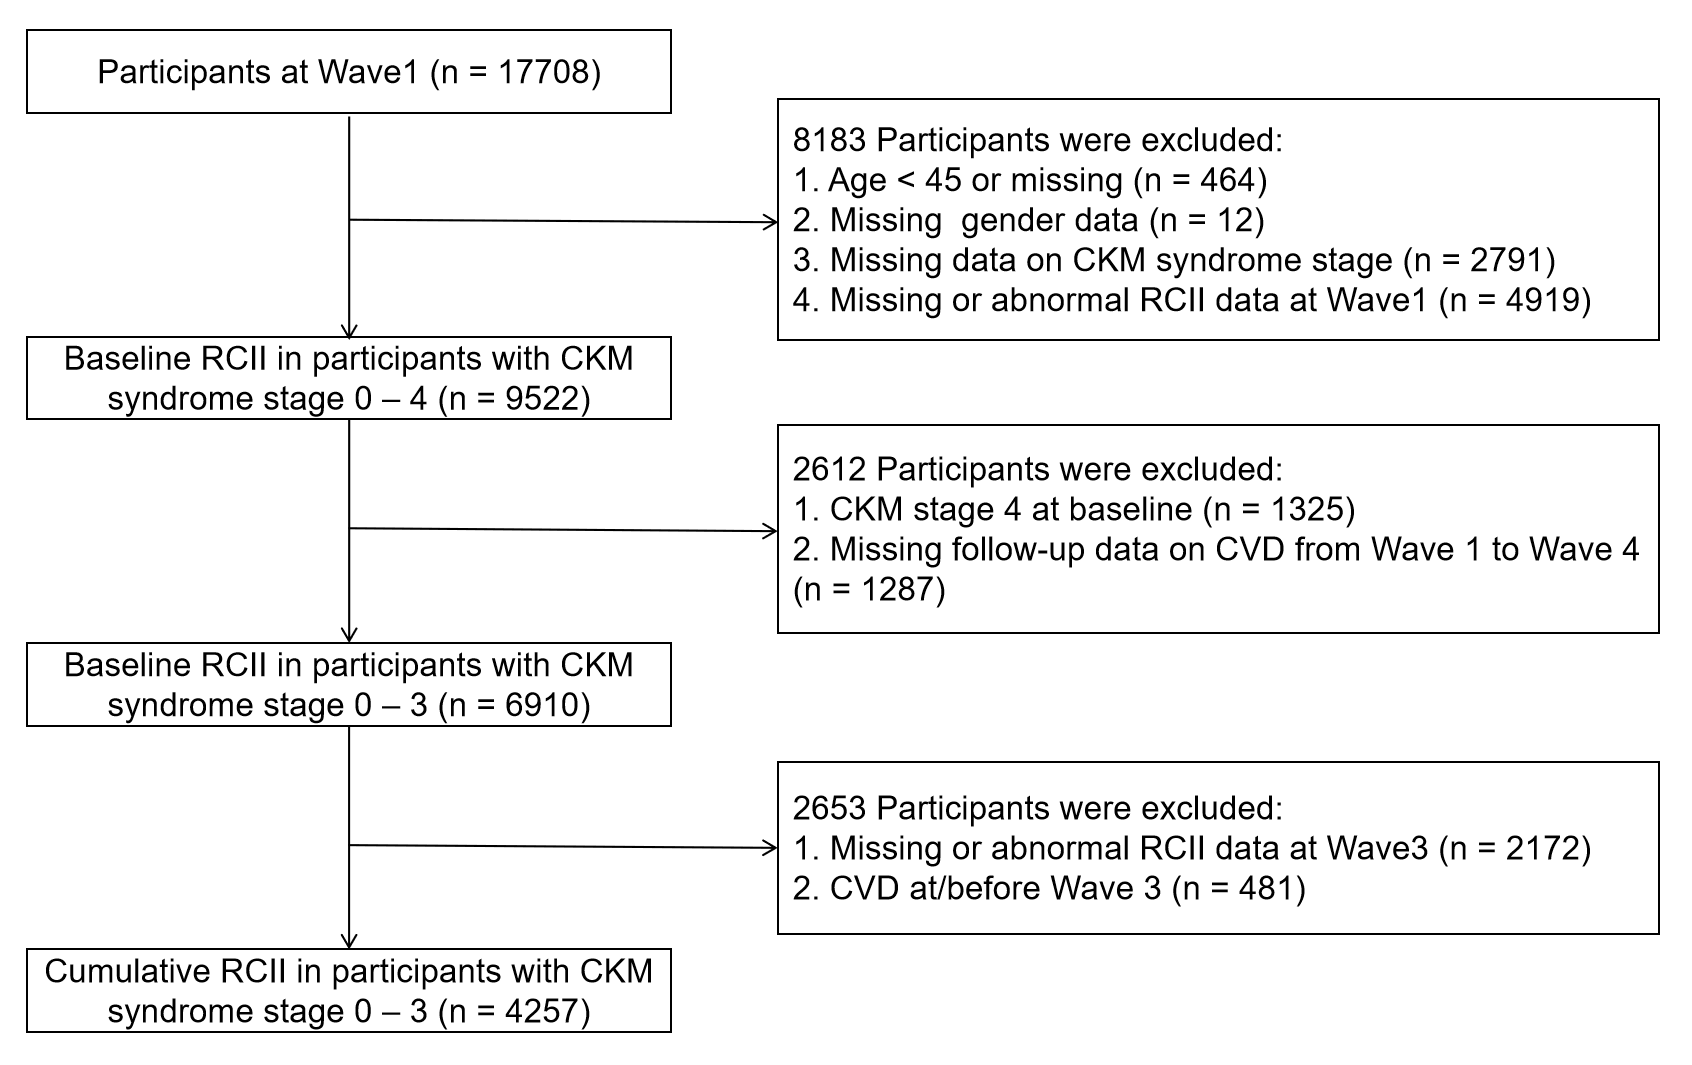
**

**Fig. S1.** Flowchart of study participants.


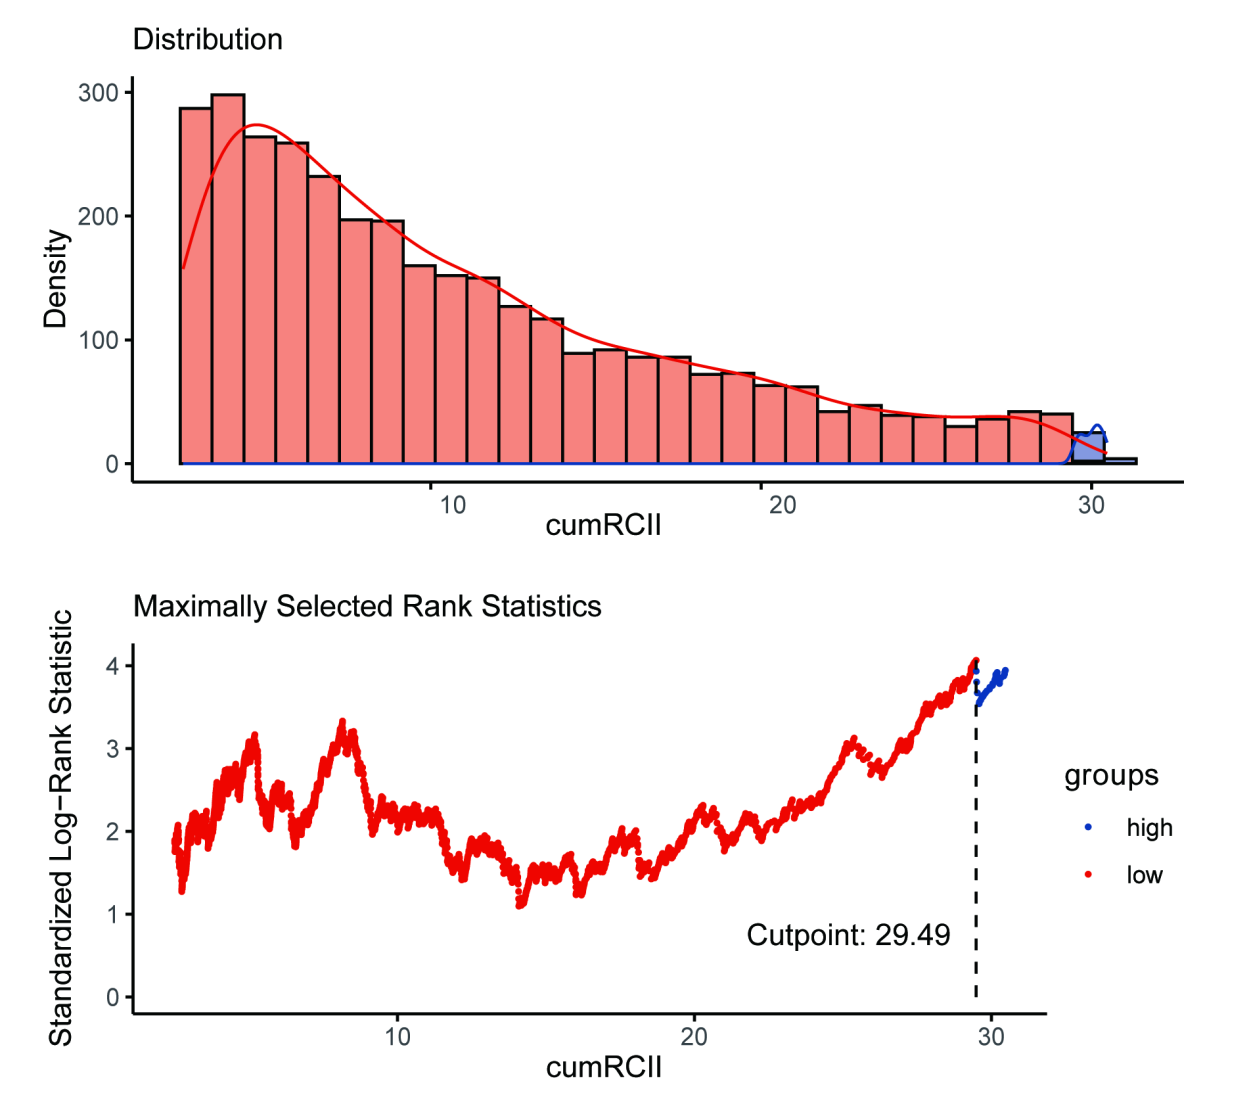


**Fig. S2.** The optimal cut-off value of CumRCII.
