# Supplementary material for: Predictive Value of Remnant Cholesterol Inflammatory Index for Cardiovascular-Kidney-Metabolic Syndrome Progression: A Prospective Cohort Study
Source: Research Square preprint supplement (doi:10.21203/rs.3.rs-7052398/v1), 2025-07-22
Supplement: Supplementary file 2 [file dc59ebeab004bffc5c58d384.xlsx]

## Sheet: Table S1
	Table S1. Definitions of CKM syndrome stages.
	CKM syndrome stages	Definition
	Stage 0: No CKM risk factors	Individuals without overweight/obesity, abdominal obesity, metabolic risk factors (hypertension, hypertriglyceridemia, prediabetes, diabetes, MetS), CKD, or subclinical/clinical CVD. All criteria are met： ● BMI < 23 kg/m2 ● Waist circumference <80/90 cm in female/male ● SBP < 130 mmHg, DBP < 80 mmHg and without self-reported diagnosis of hypertension or use of anti-hypertensive medications ● TG <…
	Stage 1: Excess or dysfunctional adiposity	Individuals with overweight/obesity, abdominal obesity, or dysfunctional adipose tissue, without the presence of other metabolic risk factors or CKD. Any of the three criteria is met: ● Overweight/obesity ● Abdominal obesity ● Prediabetes All criteria are met: ● SBP <130 mmHg and DBP <80 mmHg without self-reported diagnosis of hypertension or use of anti-hypertensive medications ● TG < 135 mg/dL …
	Stage 2: Metabolic risk factors and CKD	Individuals with metabolic risk factors (hypertriglyceridemia, hypertension, diabetes, MetS), or CKD (moderate- or high-risk). Any of the five criteria is met: ● Hypertriglyceridemia ● Hypertension ● Diabetes ● MetS ● Moderate-to-high-risk CKD All criteria are met: ● No very high-risk CKD ● Predicted 10-year CVD risk based on the Framingham risk score (female < 21.5%, male < 21.6%) ● No clinical …
	Stage 3: Subclinical CVD in CKM	Subclinical CVD among individuals with metabolic risk factors, or CKD. Any of the two criteria is met: ● Very high-risk CKD ● Predicted 10-year CVD risk based on the Framingham risk score (female ≥ 21.5%, male ≥ 21.6%) Any of the eight criteria is met: ● Overweight/obesity ● Abdominal obesity ● Prediabetes ● Hypertriglyceridemia ● Hypertension ● Diabetes ● MetS ● Moderate-to-high-risk CKD The cri…
	Stage 4: Clinical CVD in CKM	Clinical CVD among individuals with metabolic risk factors, or CKD The criterion is met: ● Clinical CVD Any of the nine criteria is met: ● Overweight/obesity ● Abdominal obesity ● Prediabetes ● Hypertriglyceridemia ● Hypertension ● Diabetes ● MetS ● Moderate-to-high-risk CKD ● Very high-risk CKD
	Overweight/obesity was defined as BMI ≥ 23 kg/m2. Abdominal obesity was defined as waist circumference (WC) ≥ 80 cm for women and ≥ 90 cm for men. Hypertension was defined as systolic blood pressure (SBP) ≥ 130 mmHg or diastolic blood pressure (DBP) ≥ 80 mmHg or self-reported diagnosis of hypertension or use of antihypertensive medications. Diabetes was defined as fasting plasma glucose (FPG) ≥12…

## Sheet: Table S2
	Table S2. Detailed missing data for covariates.
	Variables	Missing data
	Education level	9 (0.09%)
	Smoking status	2 (0.02%)
	Drinking status	3 (0.03%)
	BMI	1468 (15.42%)
	FPG	944 (9.91%)
	SBP	1385 (14.55%)
	DBP	1385 (14.55%)
	eGFR	8 (0.08%)
	Abbreviation:BMI, body mass index; FPG, fasting plasma glucose; SBP, systolic blood pressure; DBP, diastolic blood pressure; eGFR, estimated glomerular filtration rate.

## Sheet: Table S3
	Table S3.The results of multicollinearity assessment.
	Variables	VIF
	Age	1.93871
	Gender	2.19154
	Marital status	1.12549
	Education level	1.24077
	Residence	1.09171
	Smoking status	1.91519
	Drinking status	1.3418
	BMI	1.59766
	FPG	1.05921
	SBP	2.64748
	DBP	2.51243
	eGFR	1.44711
	lipid-lowering medication use	1.036
	Abbreviation:BMI, body mass index; FPG, fasting plasma glucose; SBP, systolic blood pressure; DBP, diastolic blood pressure; eGFR, estimated glomerular filtration rate; VIF, variance inflation factor.

## Sheet: Table S4
	Table S4. Baseline characteristics of participants with CKM stages 0-3 according to CVD status.
	Variables	Total	Non-CVD	CVD	P value
	No. of participants	6910	5427	1483
	Age, years	58.19 ± 8.82	57.35 ± 8.61	58.06 ± 8.88	<0.001
	Gender, n (%)				0.090
	Female	3669(53.10)	2852(52.55)	817(55.09)
	Male	3241(46.90)	2575(47.45)	666(44.91)
	Marital status, n (%)				0.010
	Married	6202(89.75)	4897(90.23)	1305(88.00)
	Other	708(10.25)	530( 9.77)	178(12.00)
	Education level, n (%)				0.270
	Elementary school and below	4749(68.73)	3712(68.40)	1037(69.93)
	Secondary school and above	2161(31.27)	1715(31.60)	446(30.07)
	Residence, n (%)				1.000
	Rural	4605(66.64)	3617(66.65)	988(66.62)
	Urban	2305(33.36)	1810(33.35)	495(33.38)
	Smoking status, n (%)				0.500
	No	4211(60.94)	3319(61.16)	892(60.15)
	Yes	2699(39.06)	2108(38.84)	591(39.85)
	Drinking status, n (%)				0.010
	No	4524(65.47)	3508(64.64)	1016(68.51)
	Yes	2386(34.53)	1919(35.36)	467(31.49)
	BMI, kg/m²	23.59 ± 3.95	23.46 ± 3.87	24.07 ± 4.21	<0.001
	Waist circumference, cm	84.09 ± 12.58	83.60 ± 12.37	85.87 ± 13.16	<0.001
	SBP, mmHg	128.48 ± 20.85	127.17 ± 20.05	133.28 ± 22.91	<0.001
	DBP, mmHg	75.05 ± 11.89	74.56 ± 11.62	76.83 ± 12.69	<0.001
	FPG, mg/dL	102.06(94.50,111.24)	101.88(94.32,110.61)	102.78(94.68,113.13)	<0.001
	HbA1c, %	5.10(4.90,5.40)	5.10(4.90,5.40)	5.20(4.90,5.50)	<0.001
	TC, mg/dL	193.52 ± 36.59	192.71 ± 36.23	196.49 ± 37.75	<0.001
	LDL-C, mg/dL	118.10 ± 33.41	117.37 ± 33.00	120.77 ± 34.74	<0.001
	HDL-C, mg/dL	51.43 ± 14.50	51.67 ± 14.48	50.58 ± 14.55	0.010
	TG, mg/dL	107.08(77.88,153.10)	106.20(77.00,150.45)	111.51(81.86,159.30)	<0.001
	Scr,mg/dL	0.77 ± 0.18	0.77 ± 0.18	0.78 ± 0.19	0.090
	eGFR, ml/(min×1.73m2)	99.71(89.98,106.26)	100.21(90.61,106.65)	98.06(87.50,104.42)	<0.001
	Diabetes, n (%)				<0.001
	No	6057(87.66)	4812(88.67)	1245(83.95)
	Yes	853(12.34)	615(11.33)	238(16.05)
	Hypertension, n (%)				<0.001
	No	3441(49.80)	2879(53.05)	562(37.90)
	Yes	3469(50.20)	2548(46.95)	921(62.10)
	Antidiabetic medications, n (%)				<0.001
	No	6715(97.18)	5305(97.75)	1410(95.08)
	Yes	195( 2.82)	122( 2.25)	73( 4.92)
	Antihypertensive medications, n (%)				<0.001
	No	5809(84.07)	4723(87.03)	1086(73.23)
	Yes	1101(15.93)	704(12.97)	397(26.77)
	Lipid-lowering medications, n(%)				<0.001
	No	6647(96.19)	5263(96.98)	1384(93.32)
	Yes	263( 3.81)	164( 3.02)	99( 6.68)
	hs-CRP, mg/L	0.94(0.52,1.84)	0.90(0.51,1.75)	1.11(0.59,2.11)	<0.001
	RC, mg/dL	20.49(12.37,31.70)	20.10(12.37,31.31)	21.65(13.14,32.86)	<0.010
	RCII	1.93(0.86,4.49)	1.82(0.83,4.24)	2.33(1.06,5.37)	<0.001
	CKM syndrome stages, n (%)				<0.001
	Stage 0	625( 9.04)	537( 9.89)	88( 5.93)
	Stage 1	1332(19.28)	1129(20.80)	203(13.69)
	Stage 2	2766(40.03)	2175(40.08)	591(39.85)
	Stage 3	2187(31.65)	1586(29.22)	601(40.53)
	Continuous variables were presented as mean ± SD or median ( upper and lower quartiles ), and categorical variables were presented as number (%). Abbreviation: BMI, body mass index; SBP, systolic blood pressure; DBP, diastolic blood pressure; HbA1c, glycosylated hemoglobin; FPG, fasting plasma glucose; TC, total cholesterol; LDL-C, low-density lipoprotein cholesterol; HDL-C, high-density lipoprot…

## Sheet: Table S5
	Table S5. Baseline characteristics of participants with CKM stages 0-3 according to RCII quartiles.
	Variables	Total	Quartiles of RCII				P value
			Q1	Q2	Q3	Q4
	No. of participants	6910	1727	1730	1725	1728
	Age, years	58.19 ± 8.82	57.35 ± 8.61	58.06 ± 8.88	58.64 ± 8.80	58.72 ± 8.91	<0.001
	Gender, n (%)						0.140
	Female	3669(53.10)	929(53.79)	892(51.56)	897(52.00)	951(55.03)
	Male	3241(46.90)	798(46.21)	838(48.44)	828(48.00)	777(44.97)
	Marital status, n (%)						0.600
	Married	6202(89.75)	1561(90.39)	1556(89.94)	1547(89.68)	1538(89.00)
	Other	708(10.25)	166( 9.61)	174(10.06)	178(10.32)	190(11.00)
	Education level, n (%)						0.970
	Elementary school and below	4749(68.73)	1191(68.96)	1185(68.50)	1180(68.41)	1193(69.04)
	Secondary school and above	2161(31.27)	536(31.04)	545(31.50)	545(31.59)	535(30.96)
	Residence, n (%)						<0.001
	Rural	4605(66.64)	1238(71.69)	1189(68.73)	1100(63.77)	1078(62.38)
	Urban	2305(33.36)	489(28.31)	541(31.27)	625(36.23)	650(37.62)
	Smoking status, n (%)						0.330
	No	4211(60.94)	1076(62.30)	1045(60.40)	1026(59.48)	1064(61.57)
	Yes	2699(39.06)	651(37.70)	685(39.60)	699(40.52)	664(38.43)
	Drinking status, n (%)						<0.010
	No	4524(65.47)	1122(64.97)	1093(63.18)	1118(64.81)	1191(68.92)
	Yes	2386(34.53)	605(35.03)	637(36.82)	607(35.19)	537(31.08)
	BMI, kg/m²	23.59 ± 3.95	22.44 ± 3.48	23.19 ± 3.76	24.00 ± 3.87	24.73 ± 4.27	<0.001
	Waist circumference, cm	84.09 ± 12.58	80.63 ± 11.16	82.84 ± 12.15	85.05 ± 12.76	87.82 ± 13.02	<0.001
	SBP, mmHg	128.48 ± 20.85	124.86 ± 19.50	126.92 ± 20.83	130.29 ± 20.69	131.87 ± 21.60	<0.001
	DBP, mmHg	75.05 ± 11.89	73.00 ± 11.39	74.38 ± 11.99	75.88 ± 11.80	76.93 ± 12.01	<0.001
	FPG, mg/dL	102.06(94.50,111.24)	99.54(92.88,107.64)	101.16(94.14,109.80)	102.78(94.68,112.32)	104.58(96.66,115.60)	<0.001
	HbA1c, %	5.10(4.90,5.40)	5.10(4.80,5.30)	5.10(4.90,5.40)	5.10(4.90,5.40)	5.20(4.90,5.60)	<0.001
	TC, mg/dL	193.52 ± 36.59	187.46 ± 34.34	190.91 ± 35.10	196.56 ± 37.33	199.15 ± 38.32	<0.001
	LDL-C, mg/dL	118.10 ± 33.41	115.93 ± 30.47	117.37 ± 32.83	120.46 ± 34.54	118.63 ± 35.43	<0.001
	HDL-C, mg/dL	51.43 ± 14.50	59.03 ± 14.11	52.95 ± 13.92	49.23 ± 13.13	44.52 ± 12.78	<0.001
	TG, mg/dL	107.08(77.88,153.10)	77.88(61.95,97.35)	101.78(77.88,132.75)	123.90(90.27,163.73)	158.41(110.63,214.17)	<0.001
	Scr,mg/dL	0.77 ± 0.18	0.75 ± 0.18	0.77 ± 0.18	0.79 ± 0.18	0.79 ± 0.18	<0.001
	eGFR, ml/(min×1.73m2)	99.71(89.98,106.26)	101.19(92.95,107.19)	100.40(91.27,106.65)	98.73(87.83,105.45)	98.18(86.94,105.50)	<0.001
	Diabetes, n (%)						<0.001
	No	6057(87.66)	1598(92.53)	1562(90.29)	1486(86.14)	1411(81.66)
	Yes	853(12.34)	129( 7.47)	168( 9.71)	239(13.86)	317(18.34)
	Hypertension, n (%)						<0.001
	No	3441(49.80)	1018(58.95)	948(54.80)	772(44.75)	703(40.68)
	Yes	3469(50.20)	709(41.05)	782(45.20)	953(55.25)	1025(59.32)
	Antidiabetic medications, n (%)						<0.001
	No	6715(97.18)	1689(97.80)	1711(98.90)	1669(96.75)	1646(95.25)
	Yes	195( 2.82)	38( 2.20)	19( 1.10)	56( 3.25)	82( 4.75)
	Antihypertensivemedications, n (%)						<0.001
	No	5809(84.07)	1553(89.92)	1513(87.46)	1402(81.28)	1341(77.60)
	Yes	1101(15.93)	174(10.08)	217(12.54)	323(18.72)	387(22.40)
	Lipid-lowering medications, n(%)						<0.001
	No	6647(96.19)	1687(97.68)	1686(97.46)	1643(95.25)	1631(94.39)
	Yes	263( 3.81)	40( 2.32)	44( 2.54)	82( 4.75)	97( 5.61)
	hs-CRP, mg/L	0.94(0.52,1.84)	0.43(0.30,0.58)	0.71(0.49,1.03)	1.19(0.84,1.74)	2.72(1.80,4.16)	<0.001
	RC, mg/dL	20.49(12.37,31.70)	10.82(7.73,15.66)	18.56(12.76,26.29)	24.36(16.62,34.02)	33.25(23.10,46.49)	<0.001
	RCII	1.93(0.86,4.49)	0.51(0.35,0.69)	1.31(1.07,1.58)	2.86(2.31,3.55)	7.99(5.80,12.15)	<0.001
	CKM syndrome stages, n (%)						<0.001
	Stage 0	625( 9.04)	309(17.89)	158( 9.13)	101( 5.86)	57( 3.30)
	Stage 1	1332(19.28)	521(30.17)	429(24.80)	234(13.57)	148( 8.56)
	Stage 2	2766(40.03)	549(31.79)	679(39.25)	774(44.87)	764(44.21)
	Stage 3	2187(31.65)	348(20.15)	464(26.82)	616(35.71)	759(43.92)
	Continuous variables were presented as mean ± SD or median ( upper and lower quartiles ), and categorical variables were presented as number (%). Abbreviation: BMI, body mass index; SBP, systolic blood pressure; DBP, diastolic blood pressure; HbA1c, glycosylated hemoglobin; FPG, fasting plasma glucose; TC, total cholesterol; LDL-C, low-density lipoprotein cholesterol; HDL-C, high-density lipoprot…

## Sheet: Table S6
	Table S6. Characteristics of participants with CKM stages 0-3 stratified by CumRCII exposure.
	Variables	Total	CumRCII		P value
			Low	High
	No. of participants	4257	3802	455
	Age, years	58.11 ± 8.51	58.03 ± 8.52	58.75 ± 8.34	0.080
	Gender, n (%)				0.120
	Female	2283(53.63)	2023(53.21)	260(57.14)
	Male	1974(46.37)	1779(46.79)	195(42.86)
	Marital status, n (%)				0.680
	Married	3836(90.11)	3423(90.03)	413(90.77)
	Other	421( 9.89)	379( 9.97)	42( 9.23)
	Education level, n (%)				0.990
	Elementary school and below	2951(69.32)	2635(69.31)	316(69.45)
	Secondary school and above	1306(30.68)	1167(30.69)	139(30.55)
	Residence, n (%)				<0.001
	Rural	2851(66.97)	2578(67.81)	273(60.00)
	Urban	1406(33.03)	1224(32.19)	182(40.00)
	Smoking status, n (%)				0.240
	No	2619(61.52)	2327(61.20)	292(64.18)
	Yes	1638(38.48)	1475(38.80)	163(35.82)
	Drinking status, n (%)				0.140
	No	2781(65.33)	2469(64.94)	312(68.57)
	Yes	1476(34.67)	1333(35.06)	143(31.43)
	BMI, kg/m²	23.58 ± 3.92	23.40 ± 3.75	25.06 ± 4.87	<0.001
	Waist circumference, cm	83.98 ± 12.61	83.42 ± 12.45	88.64 ± 13.02	<0.001
	SBP, mmHg	127.97 ± 20.19	127.46 ± 19.96	132.21 ± 21.58	<0.001
	DBP, mmHg	74.85 ± 11.63	74.62 ± 11.57	76.79 ± 11.95	<0.001
	FPG, mg/dL	101.88(94.50,110.52)	101.52(94.14,109.80)	105.48(97.29,117.18)	<0.001
	HbA1c, %	5.10(4.90,5.40)	5.10(4.90,5.40)	5.30(5.00,5.60)	<0.001
	TG, mg/dL	105.32(76.11,149.57)	100.00(74.34,139.83)	166.38(124.79,228.77)	<0.001
	Scr,mg/dL	0.77 ± 0.18	0.76 ± 0.18	0.79 ± 0.18	0.090
	eGFR, ml/(min×1.73m2)	100.18(91.17,106.31)	100.56(91.60,106.51)	98.18(86.63,103.87)	<0.001
	Baseline TC, mg/dL	192.57 ± 36.14	191.08 ± 35.62	205.03 ± 38.07	<0.001
	TC2015, mg/dL	184.25 ± 34.34	183.03 ± 33.71	194.41 ± 37.71	<0.001
	Baseline HDL-C, mg/dL	51.56 ± 14.42	52.63 ± 14.38	42.63 ± 11.25	<0.001
	HDL-C2015, mg/dL	52.16 ± 11.67	52.90 ± 11.76	45.93 ± 8.70	<0.001
	Baseline LDL-C, mg/dL	117.43 ± 32.92	116.62 ± 32.21	124.20 ± 37.68	<0.001
	LDL-C2015, mg/dL	103.52 ± 28.44	103.32 ± 27.82	105.22 ± 33.15	0.240
	Baseline hs-CRP, mg/L	0.90(0.51,1.75)	0.81(0.49,1.46)	2.81(1.54,4.69)	<0.001
	hs-CRP2015, mg/L	1.30(0.70,2.30)	1.20(0.70,1.90)	3.90(2.70,5.40)	<0.001
	Baseline RC, mg/dL	20.10(12.37,30.93)	18.56(11.60,28.22)	35.57(24.74,49.87)	<0.001
	RC2015, mg/dL	25.87(19.69,34.75)	24.71(18.92,32.05)	41.70(31.66,53.09)	<0.001
	Baseline RCII	1.83(0.84,4.20)	1.56(0.76,3.30)	9.88(5.57,15.89)	<0.001
	RCII2015	3.41(1.58,7.02)	2.97(1.46,5.58)	16.78(11.69,22.09)	<0.001
	CumRCII	9.00(4.52,17.57)	7.93(4.16,13.87)	39.22(34.14,50.47)	<0.001
	Diabetes, n (%)				<0.001
	No	3757(88.25)	3393(89.24)	364(80.00)
	Yes	500(11.75)	409(10.76)	91(20.00)
	Hypertension, n (%)				<0.001
	No	2134(50.13)	1957(51.47)	177(38.90)
	Yes	2123(49.87)	1845(48.53)	278(61.10)
	Antidiabetic medications, n (%)				<0.001
	No	4138(97.20)	3713(97.66)	425(93.41)
	Yes	119( 2.80)	89( 2.34)	30( 6.59)
	Antihypertensive medications, n (%)				<0.001
	No	3626(85.18)	3283(86.35)	343(75.38)
	Yes	631(14.82)	519(13.65)	112(24.62)
	Lipid-lowering medications, n(%)				<0.001
	No	4102(96.36)	3679(96.76)	423(92.97)
	Yes	155( 3.64)	123( 3.24)	32( 7.03)
	CKM syndrome stages, n (%)				<0.001
	Stage 0	374( 8.79)	364( 9.57)	10( 2.20)
	Stage 1	886(20.81)	854(22.46)	32( 7.03)
	Stage 2	1662(39.04)	1455(38.27)	207(45.49)
	Stage 3	1335(31.36)	1129(29.69)	206(45.27)
	Incident CVD, n (%)	509(11.96)	428(11.26)	81(17.80)	<0.001
	Continuous variables were presented as mean ± SD or median ( upper and lower quartiles ), and categorical variables were presented as number (%). Abbreviation: BMI, body mass index; SBP, systolic blood pressure; DBP, diastolic blood pressure; HbA1c, glycosylated hemoglobin; FPG, fasting plasma glucose; TC, total cholesterol; LDL-C, low-density lipoprotein cholesterol; HDL-C, high-density lipoprot…

## Sheet: Table S7
	Table S7. Baseline characteristics of participants with CKM stages 0–3 across RCII quartiles after inclusion of data from the fifth wave (2020)
	Variables	Total	Quartiles of RCII				P value
			Q1	Q2	Q3	Q4
	No. of participants	6845	1712	1710	1711	1712
	Age, years	57.92 ± 8.68	57.09 ± 8.57	57.85 ± 8.78	58.30 ± 8.63	58.46 ± 8.69	<0.001
	Gender, n (%)						0.090
	Female	3680(53.76)	932(54.44)	883(51.64)	910(53.19)	955(55.78)
	Male	3165(46.24)	780(45.56)	827(48.36)	801(46.81)	757(44.22)
	Marital status, n (%)						0.820
	Married	6171(90.15)	1552(90.65)	1539(90.00)	1544(90.24)	1536(89.72)
	Other	674( 9.85)	160( 9.35)	171(10.00)	167( 9.76)	176(10.28)
	Education level, n (%)						0.990
	Elementary school and below	4678(68.41)	1172(68.54)	1167(68.33)	1173(68.64)	1166(68.15)
	Secondary school and above	2160(31.59)	538(31.46)	541(31.67)	536(31.36)	545(31.85)
	Residence, n (%)						<0.001
	Rural	4548(66.44)	1224(71.50)	1166(68.19)	1091(63.76)	1067(62.32)
	Urban	2297(33.56)	488(28.50)	544(31.81)	620(36.24)	645(37.68)
	Smoking status, n (%)						0.310
	No	4215(61.59)	1080(63.08)	1038(60.74)	1032(60.32)	1065(62.21)
	Yes	2629(38.41)	632(36.92)	671(39.26)	679(39.68)	647(37.79)
	Drinking status, n (%)						<0.010
	No	4501(65.77)	1120(65.42)	1079(63.14)	1122(65.58)	1180(68.93)
	Yes	2343(34.23)	592(34.58)	630(36.86)	589(34.42)	532(31.07)
	BMI, kg/m²	23.59 ± 3.95	22.46 ± 3.58	23.13 ± 3.66	23.96 ± 3.78	24.79 ± 4.32	<0.001
	Waist circumference, cm	84.12 ± 12.31	80.63 ± 11.10	82.80 ± 11.81	85.27 ± 12.19	87.78 ± 12.89	<0.001
	SBP, mmHg	128.43 ± 20.63	125.10 ± 19.37	126.87 ± 20.44	129.98 ± 20.52	131.77 ± 21.50	<0.001
	DBP, mmHg	75.08 ± 11.87	73.13 ± 11.41	74.32 ± 11.69	75.79 ± 11.91	77.08 ± 12.10	<0.001
	FPG, mg/dL	101.88(94.32,111.24)	99.36(92.88,107.14)	100.98(93.78,109.44)	102.24(94.86,112.05)	104.94(96.48,116.10)	<0.001
	HbA1c, %	5.10(4.90,5.40)	5.10(4.80,5.30)	5.10(4.90,5.40)	5.10(4.90,5.40)	5.20(4.90,5.60)	<0.001
	TC, mg/dL	193.68 ± 36.40	187.73 ± 34.00	190.99 ± 35.15	196.68 ± 37.29	199.30 ± 37.91	<0.001
	LDL-C, mg/dL	118.34 ± 33.26	116.33 ± 30.14	117.76 ± 32.85	120.60 ± 34.65	118.68 ± 35.05	<0.010
	HDL-C, mg/dL	51.41 ± 14.34	58.92 ± 13.96	52.94 ± 13.58	49.21 ± 13.11	44.55 ± 12.67	<0.001
	TG, mg/dL	107.08(77.88,153.10)	77.00(61.95,97.35)	100.89(77.88,132.75)	124.79(91.15,163.73)	158.86(112.17,213.51)	<0.001
	Scr,mg/dL	0.77 ± 0.18	0.75 ± 0.18	0.77 ± 0.17	0.79 ± 0.18	0.79 ± 0.18	<0.001
	eGFR, ml/(min×1.73m2)	99.78(90.09,106.31)	101.24(93.07,107.22)	100.41(91.17,106.62)	99.09(88.03,105.63)	98.16(86.94,105.44)	<0.001
	Diabetes, n (%)						<0.001
	No	5998(87.63)	1583(92.46)	1543(90.23)	1482(86.62)	1390(81.19)
	Yes	847(12.37)	129( 7.54)	167( 9.77)	229(13.38)	322(18.81)
	Hypertension, n (%)						<0.001
	No	3417(49.92)	1009(58.94)	933(54.56)	774(45.24)	701(40.95)
	Yes	3428(50.08)	703(41.06)	777(45.44)	937(54.76)	1011(59.05)
	Antidiabetic medicationss, n (%)						<0.001
	No	6654(97.21)	1674(97.78)	1692(98.95)	1658(96.90)	1630(95.21)
	Yes	191( 2.79)	38( 2.22)	18( 1.05)	53( 3.10)	82( 4.79)
	Antihypertensive medicationss, n (%)						<0.001
	No	5752(84.03)	1545(90.25)	1496(87.49)	1389(81.18)	1322(77.22)
	Yes	1093(15.97)	167( 9.75)	214(12.51)	322(18.82)	390(22.78)
	Lipid-lowering medicationss, n(%)						<0.001
	No	6583(96.17)	1673(97.72)	1665(97.37)	1630(95.27)	1615(94.33)
	Yes	262( 3.83)	39( 2.28)	45( 2.63)	81( 4.73)	97( 5.67)
	hs-CRP, mg/L	0.93(0.52,1.82)	0.42(0.30,0.58)	0.70(0.49,1.01)	1.18(0.82,1.71)	2.69(1.78,4.15)	<0.001
	RC, mg/dL	20.49(12.37,31.70)	10.82(7.64,15.46)	18.17(12.76,25.90)	24.36(17.01,34.02)	33.25(23.20,46.78)	<0.001
	RCII	1.91(0.85,4.46)	0.50(0.35,0.68)	1.29(1.06,1.56)	2.84(2.29,3.52)	7.98(5.77,12.30)	<0.001
	CKM syndrome stages, n (%)						<0.001
	Stage 0	637( 9.31)	317(18.52)	158( 9.24)	106( 6.20)	56( 3.27)
	Stage 1	1329(19.42)	508(29.67)	433(25.32)	240(14.03)	148( 8.64)
	Stage 2	2777(40.57)	551(32.18)	669(39.12)	781(45.65)	776(45.33)
	Stage 3	2102(30.71)	336(19.63)	450(26.32)	584(34.13)	732(42.76)
	Continuous variables were presented as mean ± SD or median ( upper and lower quartiles ), and categorical variables were presented as number (%). Abbreviation: BMI, body mass index; SBP, systolic blood pressure; DBP, diastolic blood pressure; HbA1c, glycosylated hemoglobin; FPG, fasting plasma glucose; TC, total cholesterol; LDL-C, low-density lipoprotein cholesterol; HDL-C, high-density lipoprot…

## Sheet: Table S8
	Table S8. Association between RCII and the risk of incident CVD in participants with CKM stages 0-3 after inclusion of data from the fifth wave (2020)
		Event/total, n (%)	Crude model		Model 1		Model 2
			HR (95% CI)	P	HR (95% CI)	P	HR (95% CI)	P
	RCII per SD		1.14 (1.10, 1.18)	<0.001	1.13 (1.08, 1.17)	<0.001	1.07 (1.03, 1.11)	0.002
	RCII quartile
	Q1	369/1712 (21.55)	Ref		Ref		Ref
	Q2	446/1710 (26.08)	1.24 (1.08, 1.42)	0.002	1.22 (1.06, 1.40)	0.006	1.17 (1.01, 1.34)	0.031
	Q3	511/1711 (29.87)	1.45 (1.27, 1.66)	<0.001	1.40 (1.22, 1.60)	<0.001	1.26 (1.10, 1.44)	0.001
	Q4	562/1712 (32.83)	1.64 (1.44, 1.87)	<0.001	1.57 (1.37, 1.79)	<0.001	1.33 (1.16, 1.52)	<0.001
	P for trend			<0.001		<0.001		<0.001
	Crude model: non-adjusted. Model 1: adjusted for age, gender. Model 2: adjusted for age, gender, marital status, education level, residence, smoking, drinking, BMI, eGFR, FPG, SBP, DBP, LDL, lipid-lowering medication use. Abbreviation: HR, hazard ratio; CI, confidence interval; SD, standard deviation; RCII, remnant cholesterol inflammatory index; CVD, cardiovascular disease; CKM, cardiovascular-k…

## Sheet: Table S9
	Table S9. Characteristics of participants with CKM stages 0-3 stratified by CumRCII exposure after inclusion of data from the fifth wave (2020).
	Variables	Total	CumRCII		P value
			Low	High
	No. of participants	4162	3720	442
	Age, years	57.83 ± 8.39	57.77 ± 8.43	58.36 ± 7.99	0.150
	Gender, n (%)				0.160
	Female	2265(54.42)	2010(54.03)	255(57.69)
	Male	1897(45.58)	1710(45.97)	187(42.31)
	Marital status, n (%)				1.000
	Married	3772(90.63)	3371(90.62)	401(90.72)
	Other	390( 9.37)	349( 9.38)	41( 9.28)
	Education level, n (%)				0.760
	Elementary school and below	2879(69.17)	2570(69.09)	309(69.91)
	Secondary school and above	1283(30.83)	1150(30.91)	133(30.09)
	Residence, n (%)				<0.010
	Rural	2779(66.77)	2510(67.47)	269(60.86)
	Urban	1383(33.23)	1210(32.53)	173(39.14)
	Smoking, n (%)				0.450
	No	2592(62.28)	2309(62.07)	283(64.03)
	Yes	1570(37.72)	1411(37.93)	159(35.97)
	Drinking, n (%)				0.420
	No	2730(65.59)	2432(65.38)	298(67.42)
	Yes	1432(34.41)	1288(34.62)	144(32.58)
	BMI, kg/m²	23.59 ± 3.89	23.42 ± 3.72	25.06 ± 4.85	<0.001
	Waist circumference, cm	83.96 ± 12.49	83.42 ± 12.32	88.50 ± 13.00	<0.001
	SBP, mmHg	127.86 ± 20.17	127.36 ± 19.97	132.03 ± 21.35	<0.001
	DBP, mmHg	74.89 ± 11.65	74.64 ± 11.58	77.01 ± 12.04	<0.001
	FPG, mg/dL	101.70(94.50,110.34)	101.34(94.14,109.80)	105.48(97.24,116.28)	<0.001
	HbA1c, %	5.10(4.90,5.40)	5.10(4.90,5.40)	5.30(5.00,5.60)	<0.001
	TG, mg/dL	105.32(76.11,149.57)	100.89(74.34,139.83)	166.38(124.79,227.00)	<0.001
	Scr,mg/dL	0.76 ± 0.17	0.76 ± 0.17	0.79 ± 0.17	<0.001
	eGFR, ml/(min×1.73m2)	100.31(91.37,106.39)	100.59(91.69,106.56)	98.46(87.22,104.14)	<0.001
	Baseline TC, mg/dL	192.85 ± 36.25	191.38 ± 35.68	205.14 ± 38.69	<0.001
	TC2015, mg/dL	184.51 ± 34.35	183.31 ± 33.67	194.67 ± 38.18	<0.001
	Baseline HDL-C, mg/dL	51.59 ± 14.31	52.64 ± 14.28	42.77 ± 11.29	<0.001
	HDL-C2015, mg/dL	52.14 ± 11.60	52.87 ± 11.68	46.00 ± 8.71	<0.001
	Baseline LDL-C, mg/dL	117.73 ± 32.97	116.93 ± 32.24	124.40 ± 37.96	<0.001
	LDL-C2015, mg/dL	103.74 ± 28.36	103.53 ± 27.70	105.44 ± 33.36	0.250
	Baseline hs-CRP, mg/L	0.90(0.51,1.75)	0.80(0.48,1.46)	2.81(1.53,4.65)	<0.001
	hs-CRP2015, mg/L	1.30(0.70,2.30)	1.20(0.70,1.90)	3.90(2.62,5.38)	<0.001
	Baseline RC, mg/dL	20.10(12.37,30.93)	18.56(11.60,28.22)	35.18(24.74,49.87)	<0.001
	RC2015, mg/dL	25.87(19.69,34.75)	24.71(18.92,32.43)	41.89(30.89,53.19)	<0.001
	Baseline RCII	1.81(0.82,4.17)	1.54(0.74,3.27)	9.99(5.55,15.87)	<0.001
	RCII2015	3.40(1.58,6.93)	2.96(1.45,5.58)	16.84(11.29,22.21)	<0.001
	CumRCII	8.96(4.50,17.56)	7.88(4.15,13.85)	39.42(34.26,50.23)	<0.001
	Diabetes, n (%)				<0.001
	No	3672(88.23)	3316(89.14)	356(80.54)
	Yes	490(11.77)	404(10.86)	86(19.46)
	Hypertension, n (%)				<0.001
	No	2086(50.12)	1911(51.37)	175(39.59)
	Yes	2076(49.88)	1809(48.63)	267(60.41)
	Antidiabetic medications, n (%)				<0.001
	No	4044(97.16)	3631(97.61)	413(93.44)
	Yes	118( 2.84)	89( 2.39)	29( 6.56)
	Antihypertensive medications, n (%)				<0.001
	No	3548(85.25)	3210(86.29)	338(76.47)
	Yes	614(14.75)	510(13.71)	104(23.53)
	Lipid-lowering medications, n(%)				<0.001
	No	4009(96.32)	3597(96.69)	412(93.21)
	Yes	153( 3.68)	123( 3.31)	30( 6.79)
	CKM syndrome stages, n (%)				<0.001
	Stage 0	371( 8.91)	362( 9.73)	9( 2.04)
	Stage 1	876(21.05)	841(22.61)	35( 7.92)
	Stage 2	1648(39.60)	1443(38.79)	205(46.38)
	Stage 3	1267(30.44)	1074(28.87)	193(43.67)
	Incident CVD, n (%)	778(18.69)	666(17.90)	112(25.34)	<0.001
	Continuous variables were presented as mean ± SD or median ( upper and lower quartiles ), and categorical variables were presented as number (%). Abbreviation: BMI, body mass index; SBP, systolic blood pressure; DBP, diastolic blood pressure; HbA1c, glycosylated hemoglobin; FPG, fasting plasma glucose; TC, total cholesterol; LDL-C, low-density lipoprotein cholesterol; HDL-C, high-density lipoprot…

## Sheet: Table S10
	Table S10. Association between CumRCII and the risk of incident CVD in participants with CKM stages 0-3 after inclusion of data from the fifth wave (2020).
		Event/total, n (%)	Crude model		Model 1		Model 2
			HR (95% CI)	P	HR (95% CI)	P	HR (95% CI)	P
	CumRCII per SD		1.15 (1.08, 1.22)	<0.001	1.15 (1.08, 1.22)	<0.001	1.07 (1.00, 1.15)	0.045
	CumRCII group
	Low (< 29.49)	666/3720 (17.90)	Ref		Ref		Ref
	High (≥ 29.49)	112/442 (25.34)	1.48 (1.21, 1.81)	<0.001	1.45 (1.19, 1.78)	<0.001	1.23 (1.00, 1.52)	0.047
	Crude model: non-adjusted. Model 1: adjusted for age, gender. Model 2: adjusted for age, gender, marital status, education level, residence, smoking, drinking, BMI, eGFR, FPG, SBP, DBP, LDL, lipid-lowering medication use. Abbreviation: HR, hazard ratio; CI, confidence interval; SD, standard deviation; cumRCII, cumulative remnant cholesterol inflammatory index; CVD, cardiovascular disease; CKM, ca…
